# Supplementary material
Source: PubMed Central journal article supplement (PMC4192149)
Supplement: NIHMS616753-supplement-1.pdf [file NIHMS616753-supplement-1.pdf]

## Supplementary Figure 1. Cell quantification and extracellular antigen expression.

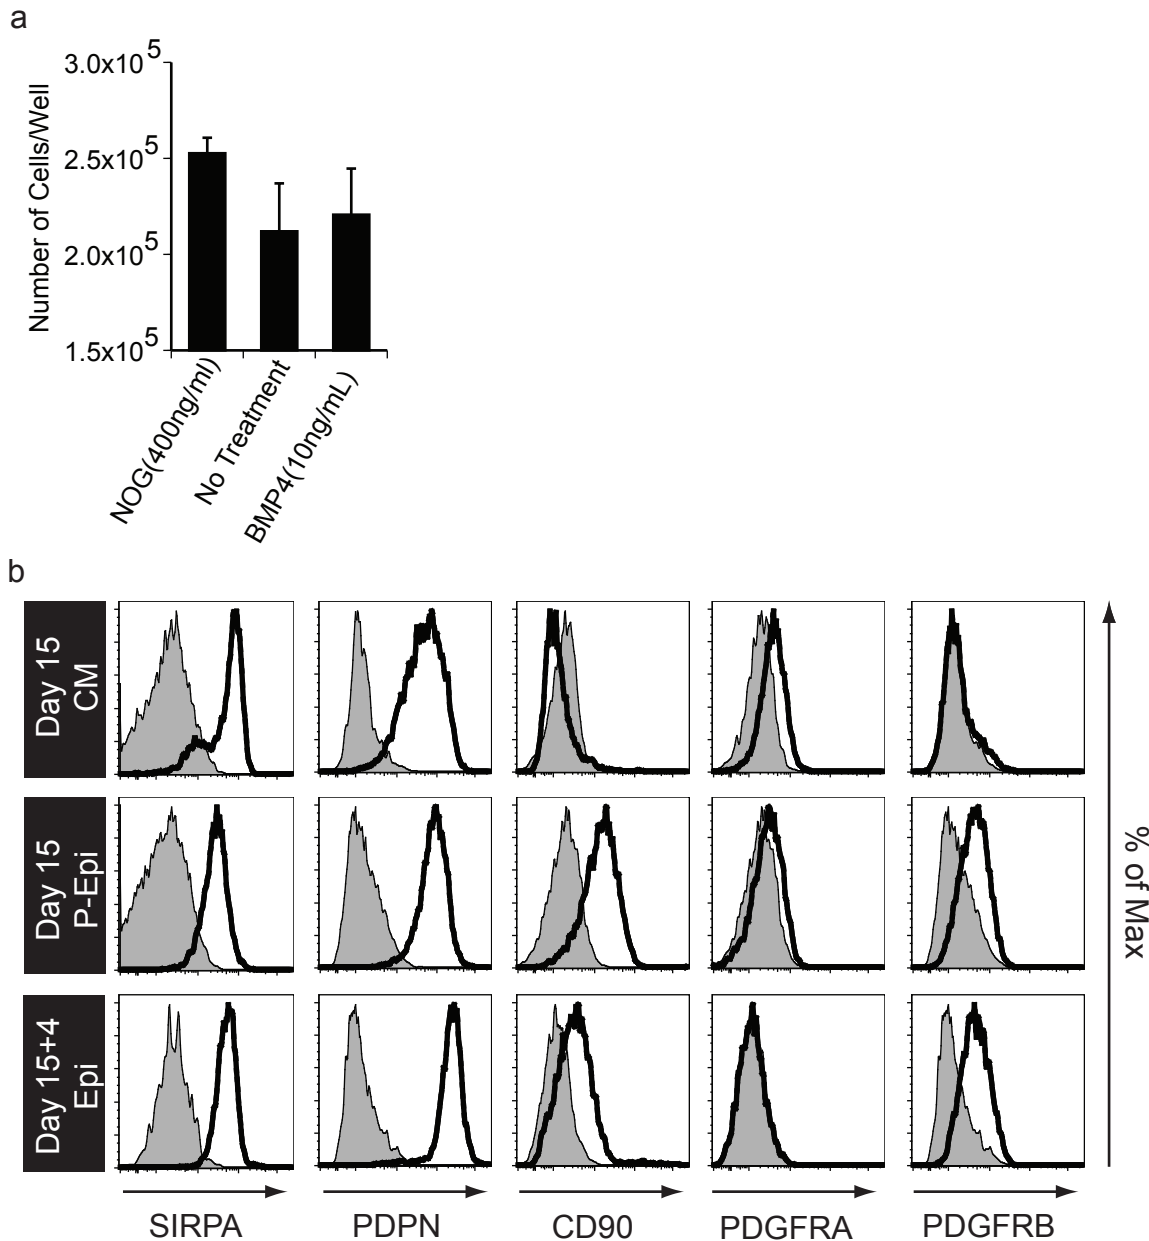

**(a)** Cell numbers in D15 cultures treated with BMP4 (10ng/ml), NOGGIN (NOG, 400ng/ml) or no treatment (control). Bars represent standard error of the mean of the values from three independent experiments (N=3); No significant differences in cell numbers was detected between the groups based on analysis by Student's T-test.

**(b)** Flow cytometric analyses of the frequency of cells expressing the indicated markers (black line) in D15 CM, D15 P-Epi and D15+4 Epi populations. In tinted gray area, negative controls.

**Supplementary Figure 2. The cardiomyocyte and epicardial lineages are derived from day 4 PDGFRA+ Cells.**

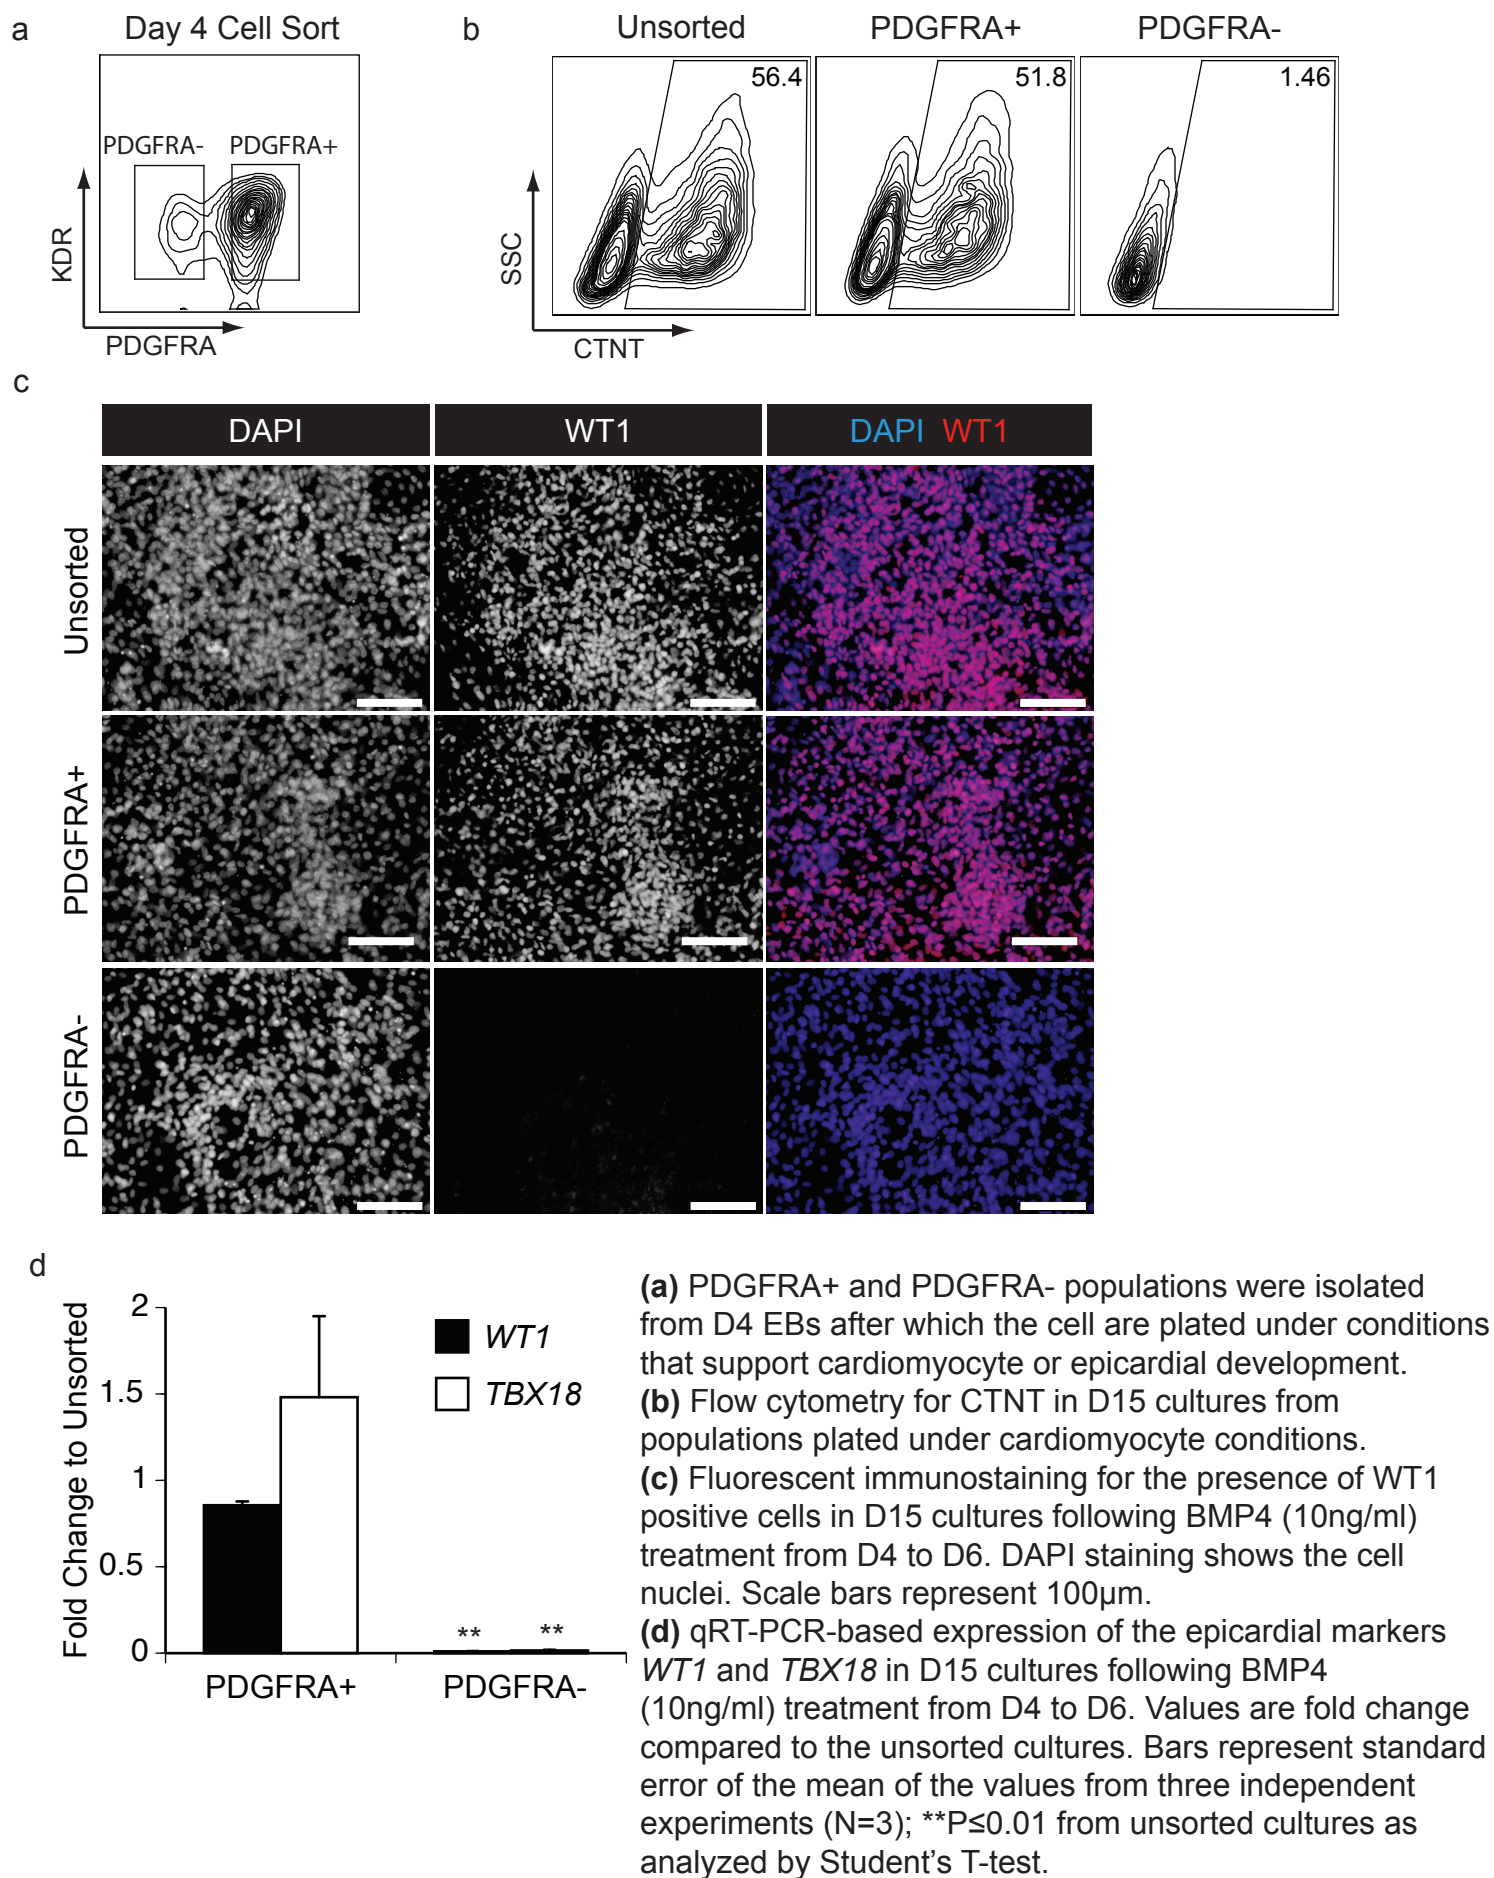

**Supplementary Figure 3. BFGF and VEGF signaling during epicardial specification and maturation.**

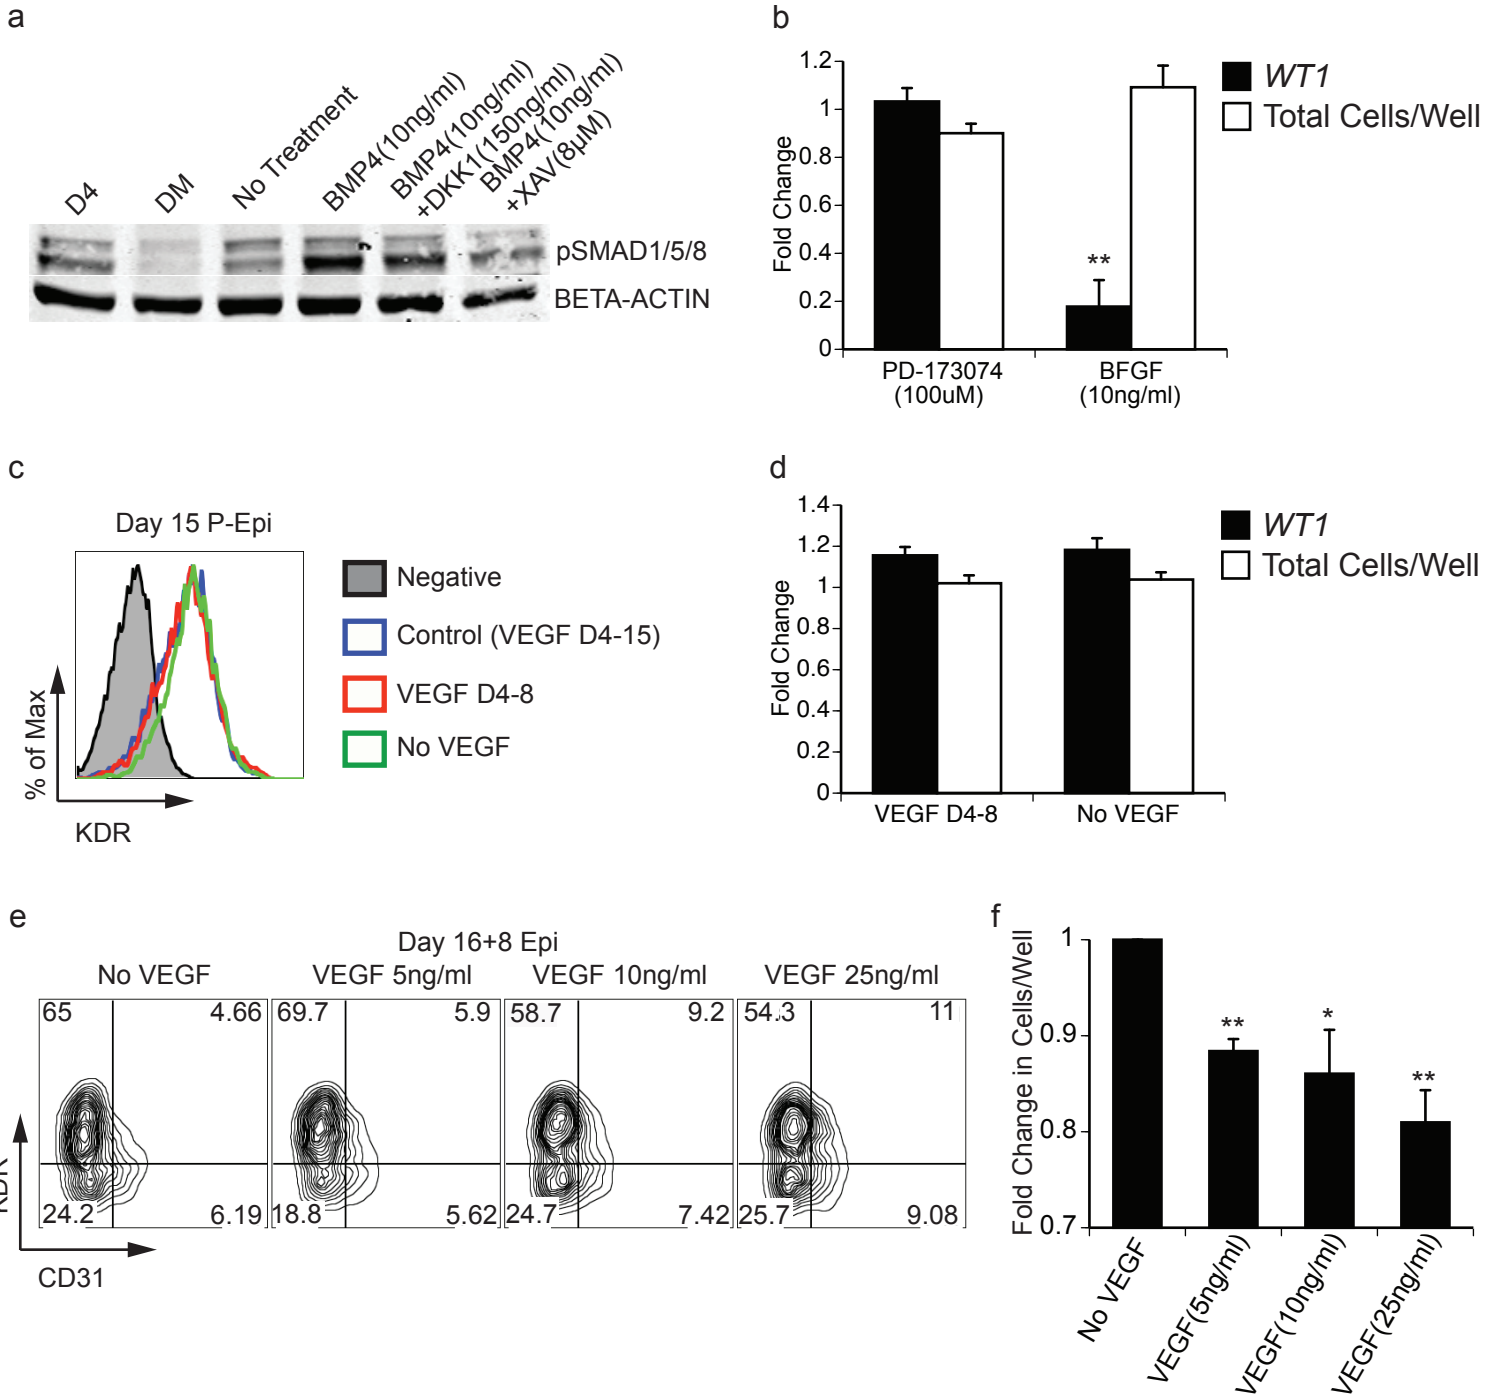

### **Supplementary Figure 3. BFGF and VEGF signaling during epicardial specification and maturation.**

- (a)** Western blot analyses for pSMAD1/5/8 in D4 populations following treatment with the indicated agonists and antagonists for 30 minutes. BETA-ACTIN is shown as loading control.
- (b)** WT1 expression as determined by qRT-PCR analyses and total cell numbers per well in D15 populations generated from D4 mesoderm by treatment with BMP4 and CHIR together with either the FGF inhibitor PD-173074 (100u  $\mu$ M) or BFGF (10ng/ml). Values shown are relative to populations generated from mesoderm treated with only BMP4 and CHIR without manipulation of the FGF pathway. Bars represent standard error of the mean of the values from three independent experiments (N=3); \*\*P $\leq$ 0.01 from unsorted cultures as analyzed by Student's T-test.
- (c)** Flow cytometric analyses of the frequency of KDR+ cells in D15 P-Epi populations generated from D4 mesoderm treated with BMP4 and CHIR (D4-D6) together with VEGF (5ng/ml) from either D4-D8 or D4-15 (control) or no additional factor (no VEGF).
- (d)** WT1 expression as determined by qRT-PCR analyses and total cell numbers per well in D15 populations generated from D4 mesoderm by treatment with BMP4 and CHIR (D4-D6) together with either VEGF (D4-D8) or no additional VEGF. Values shown are relative to populations generated from mesoderm treated with only BMP4 and CHIR. Bars represent standard error of the mean of the values from three independent experiments (N=3).
- (e)** Flow cytometric analyses of the frequency of KDR+ and CD31+ cells in D16+8 Epi populations cultured in the presence of the indicated amounts of VEGF.
- (f)** Relative number of Epi cells in D16+8 populations following culture in the indicated concentrations of VEGF. Values shown are fold change in total cell relative to untreated (no VEGF) control, which is set at 1. Bars represent standard error of the mean of the values from three independent experiments (N=3); \*P $\leq$ 0.05, \*\*P $\leq$ 0.01 compared to no treatment control as analyzed by Student's T-test.

**Supplementary Figure 4. The generation of epicardial cells from additional hPSC lines.**

**a**

Sendai hiPSC Day 15+3 Epi

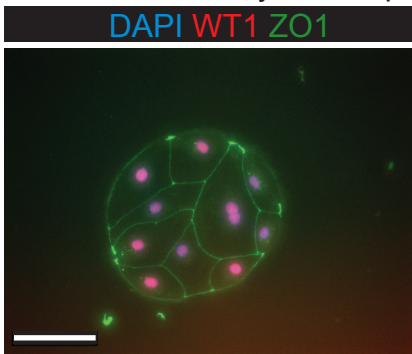

Sendai hiPSC WT1+ Differentiation Protocol Schematic

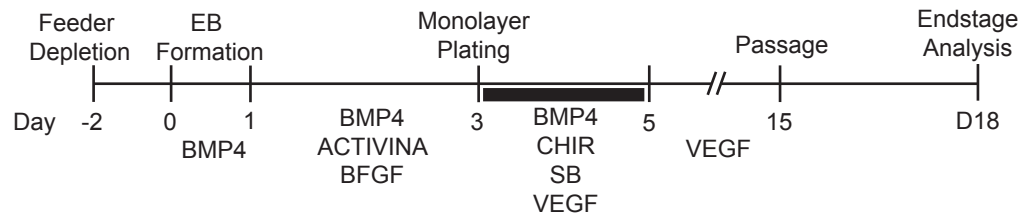

**b**

H7 Day 15+3 Epi

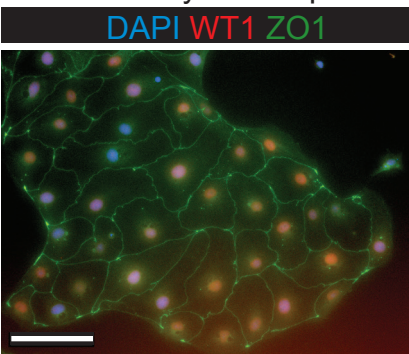

H7 ESC WT1+ Differentiation Protocol Schematic

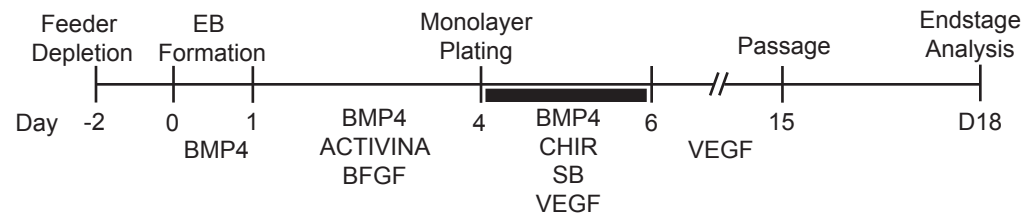

**(a)** Fluorescent immunostaining for the presence of WT1 (red) and ZO1 (green) protein in hiPSC-derived epicardial population. DAPI (blue) staining shows cell nuclei. Scale bars represent 100 $\mu$ m. Scheme indicates timing of manipulations and analysis.

**(b)** Fluorescent immunostaining showing the presence of WT1 (red) and ZO1 (green) protein in a H7 hESC-derived epicardial population. DAPI (blue) staining shows cell nuclei. Scale bars represent 100 $\mu$ m. Scheme indicates timing of manipulations and analysis.

# Supplementary Figure 5. Calcium imaging in epicardial-derived populations.

a

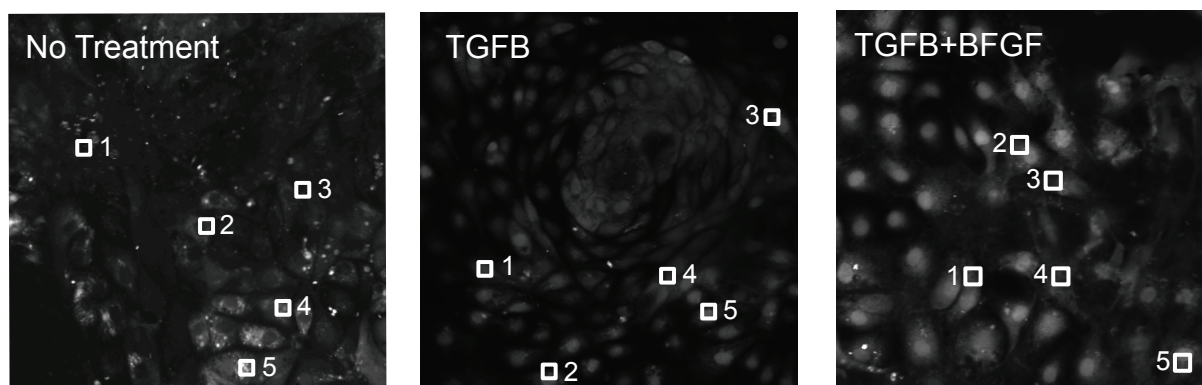

b

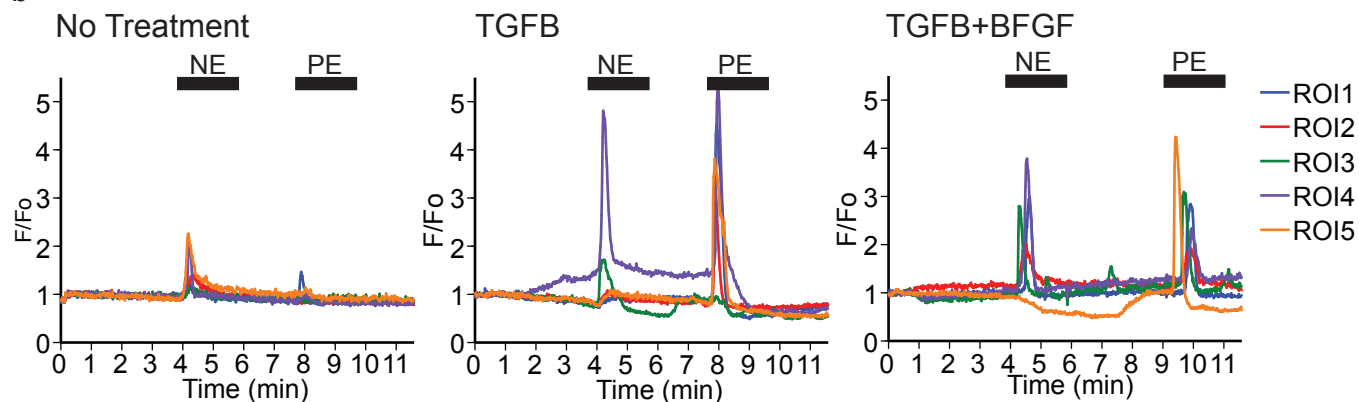

c

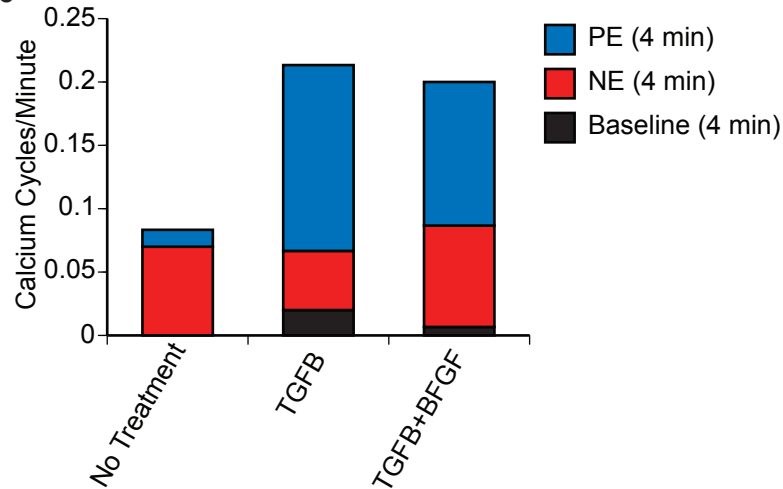

d

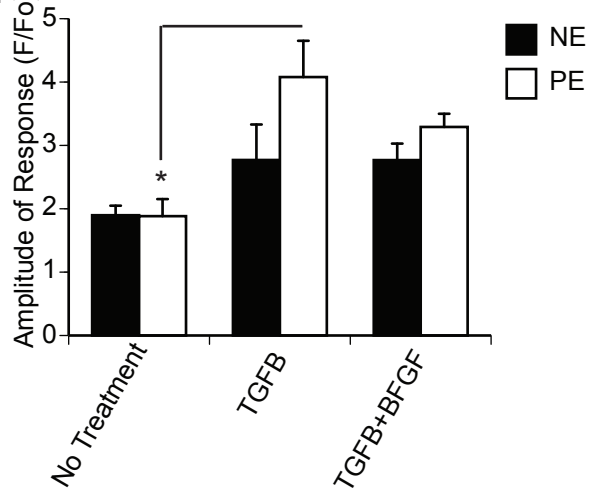

e

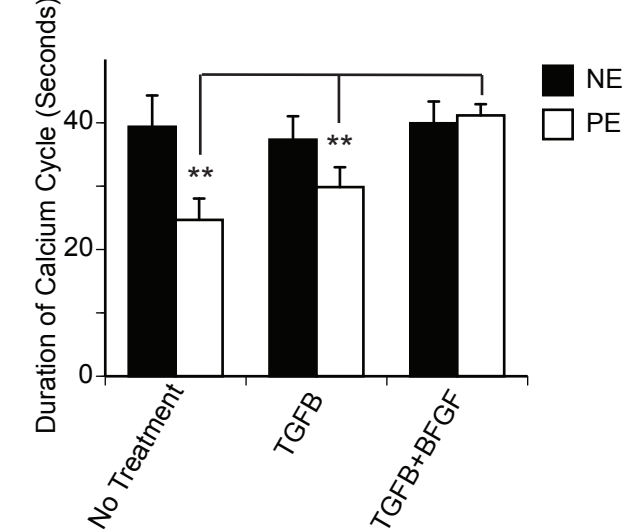

## Supplementary Figure 5. Calcium imaging in epicardial-derived populations.

**(a)** Representative fields of view depict Fluo 4-AM-generated fluorescence signal averaged over the 12-min recording in cultures on D8 following EMT induced with the indicated factors. Numbered boxes correspond to regions of interest (ROI) from where fluorescence was recorded.

**(b)** Calcium imaging examining the functional response of epicardial-derived SMCs to the agonists norepinephrine (NE) and phenylephrine (PE). ROIs corresponding to cells measure the average fluorescence intensity normalized to baseline ( $F/F_0$ ). Peaks correspond to active calcium cycles in response to agonists. 20  $\mu$ M NE was added at 4min, and 15  $\mu$ M PE was added at 8min, eliciting varied responses between the groups.

**(c)** The frequency of calcium cycles in actively cycling cells in the conditions as indicated at baseline and after NE and PE addition. Stacked bars represent the contribution to frequency of calcium cycling during baseline recording (blue), and after NE (red) or PE (green) treatment.

**(d)** The amplitude of calcium transients after NE and PE addition in the EMT induced cultures. No Treatment NE N=6 cells, PE N=4 cells; TGFB NE N=6 cells, PE N=12 cells; TGFB+BFGF NE N=13 cells, PE N=25 cells. \* $P < 0.05$  compared by one-way ANOVA with Tukey post hoc test.

**(e)** The duration of calcium transients after NE and PE addition in the EMT induced cultures. No Treatment NE N=6 cells, PE N=4 cells; TGFB NE N=6 cells, PE N=12 cells; TGFB+BFGF NE N=13 cells, PE N=25 cells. \*\* $P < 0.01$  compared by one-way ANOVA with Tukey post hoc test.

Supplementary Figure 6. Matrigel invasion of epicardial-derived populations.

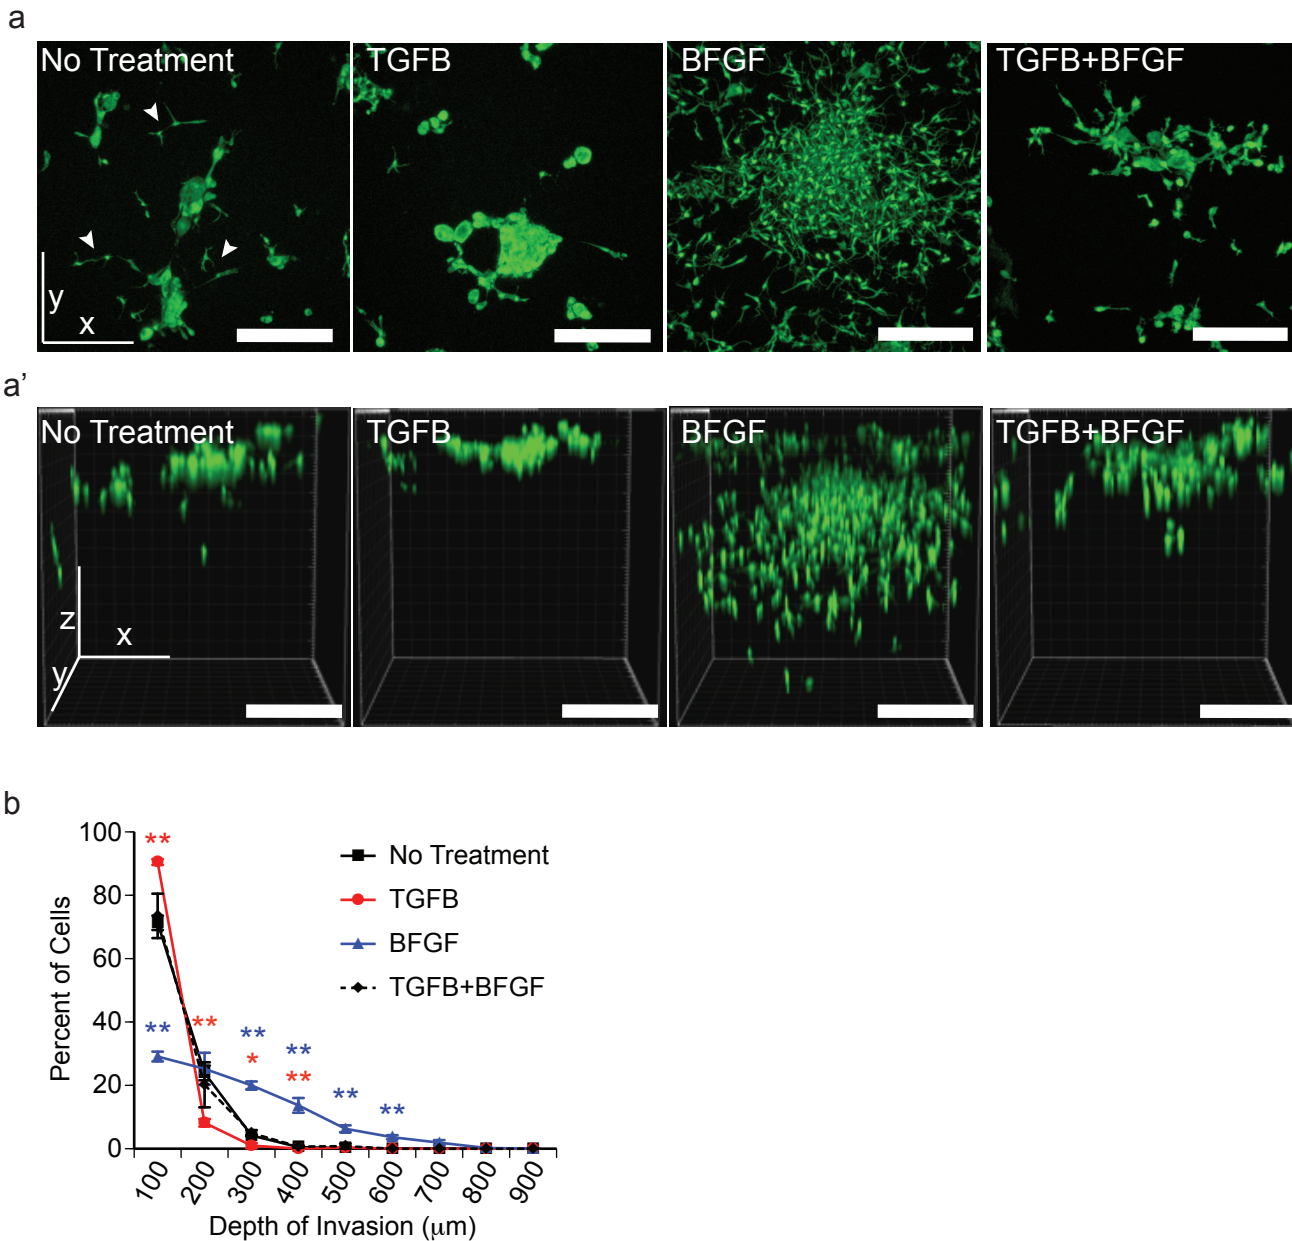

**(a)** Representative fields of view in the XY plane (top view) of the matrigel invasion assay on D8 after EMT induction. White arrowheads in the no treatment condition indicate cells displaying EMT morphology. Scale bars represent 100µm.

**(a')** Representative 3D reconstruction (side view) of the matrigel invasion assay on D8 after EMT induction. Scale bars represent 100µm.

**(b)** Percent of cells binned within a given matrigel invasion depth on D8 following EMT initiation. Bars represent standard error of the mean of the values from three independent experiments (N=3); \*P≤0.05, \*\*P≤0.01 compared to non-treated controls as analyzed by Student's T-test.



**Supplementary Figure 7. Epicardial cells up regulate ALDH1A2 expression and display aldehyde dehydrogenase activity following passage.**

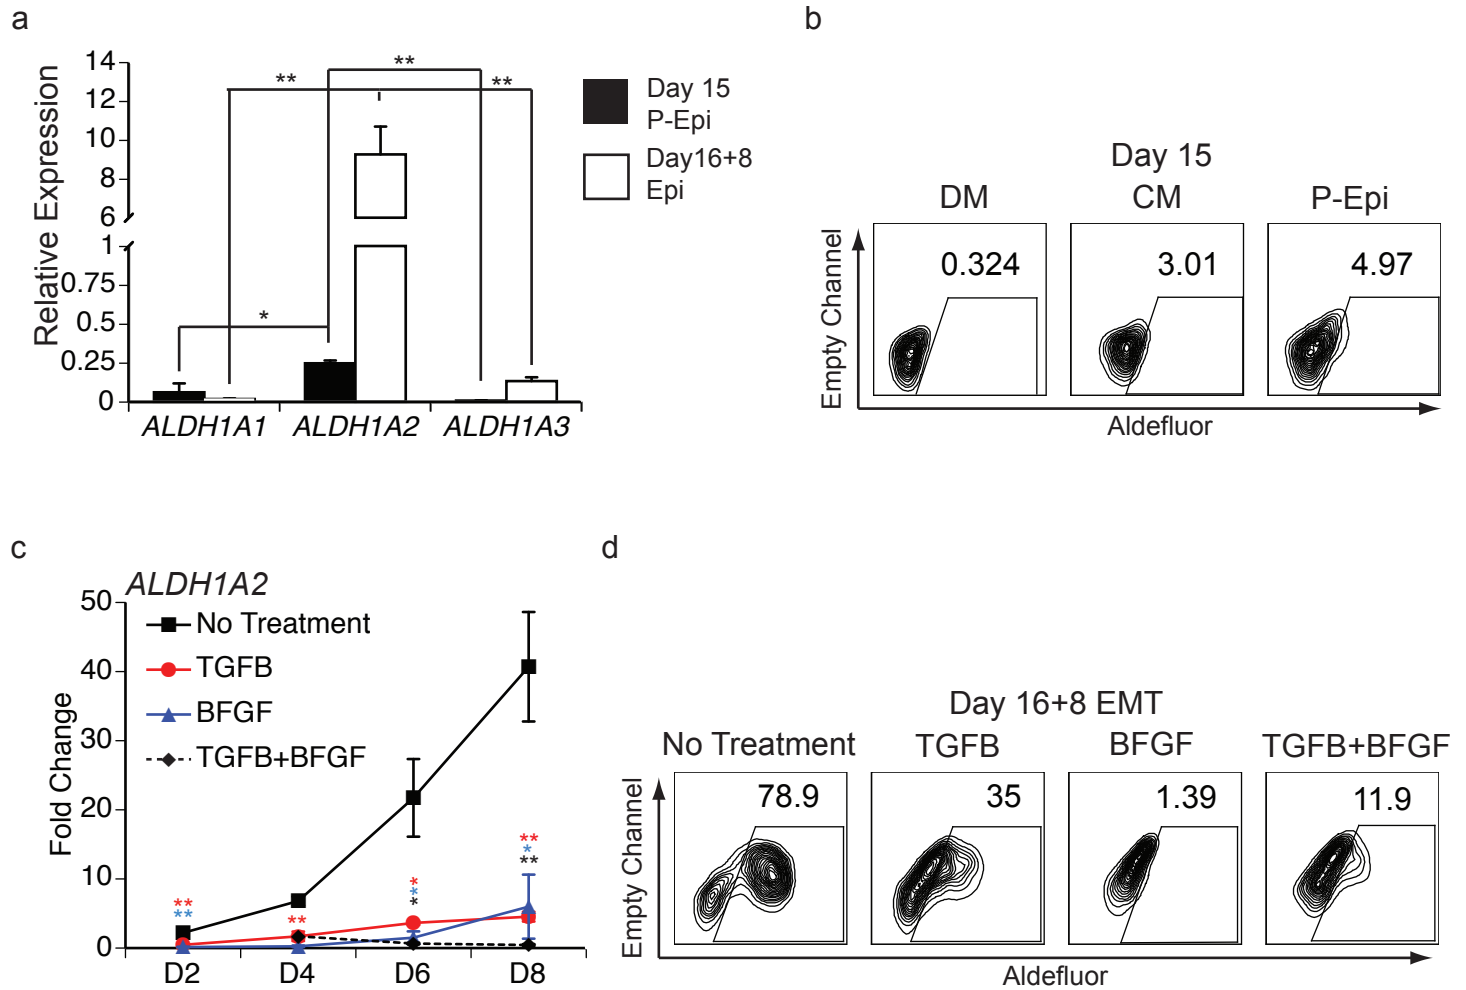

**(a)** qRT-PCR-based expression of ALDH1A1, ALDH1A2 and ALDH1A3 in D15 P-Epi cultures and D16+8 post-passage non-treated Epi cultures. Values are relative to the housekeeping gene TBP. Bars represent standard error of the mean of the values from three independent experiments (N=3); \*P≤0.05, \*\*P≤0.01 compared to ALDH1A2 expression levels as analyzed by Student's T-test.

**(b)** Flow cytometry for Aldefluor on representative D15 cultures generated from cells treated specified with DM, BMP4+XAV (cardiomyocytes; CM) or BMP4+CHIR (P-Epi cells).

**(c)** qRT-PCR-based expression of ALDH1A2 on days (D) 2, 4, 6 and 8 after EMT initiation in Epi cultures. Values are expressed as fold change to experiment-matched pre-passaged D15 P-Epi cultures. Values are relative to the housekeeping gene TBP. Bars represent standard error of the mean of the values from three independent experiments (N=3); \*P≤0.05, \*\*P≤0.01 compared to no treatment as analyzed by Student's T-test.

**(d)** Flow cytometry for Aldefluor on representative Epi-derived populations 8 days after EMT initiation with the indicated treatments.

A.Witty Supplementary Table 1 - qRT-PCR Primer List

| Gene           | Forward Primer                     | Reverse Primer                     |
|----------------|------------------------------------|------------------------------------|
| <i>ALDH1A1</i> | TTT GGA AGA TAG GGC CTG CAC TGA    | TAA AGA TGC CAC GTG GAG AGC AGT    |
| <i>ALDH1A2</i> | TTT GCC AAG TTC CAT TGT GCC AGG    | TGG TGG AGT CAC TGG AAA GCA GAA    |
| <i>ALDH1A3</i> | GGT CTT TGT GGA TTG CAT GTT        | GAC TAA GCT CTC TGG GCT ATT G      |
| <i>ANXA8</i>   | ACA CGA ATC CAT CCC AAC CGA GAT    | AAC ACA GTG TCC TTG GGT CAG GAA    |
| <i>AXIN2</i>   | TTG AGC TAG CAG TGC GTTCATGGT      | TCT GCA TGT GTC AAT GGT AGG GCA    |
| <i>BNC1</i>    | TGG GTT GCC CAT AAC CTG TCA TCT    | TAC TTT GCA TTT GTG GAG CTG CCG    |
| <i>CNN1</i>    | AAG GAC GCA CTG AGC AAC GCT ATT    | ACG CCA CTG TCA CAT CCA CAT AGT    |
| <i>GATA4</i>   | CGA ATG ACG GCA TCT GTT TGC CAT    | ATT TGG TAT TAG GGA TGC AGG GCG    |
| <i>GATA5</i>   | ACC AAG ATT CCC AGT GAA GCA CCT    | TCC GTC TAT CCA TGT GGG CAA TGA    |
| <i>GPM6A</i>   | TTC CCT ATG CCT CTC TGA TTG CCA    | ACA TCC AGT GTG TCT CCA GCA GTT    |
| <i>ISL1</i>    | GAA GGT GGA GCT GCA TTG GTT TGA    | TAA ACC AGC TAC AGG ACA GGC CAA    |
| <i>KRT19</i>   | ATA GTG AGC GGC AGA ATC AGG AGT    | AGA GGA CCT TGG AGG CAG ACA AAT    |
| <i>KRT8</i>    | CCA TTA AGG ATG CCA ACG CCA AGT    | TGA CGT TCA TCA GCT CCT GGT ACT    |
| <i>MYH11</i>   | AGA AGC CAG GGA GAA GGA AAC CAA    | TGG AGC TGA CCA GGT CTT CCA TTT    |
| <i>NKX2-5</i>  | TTT GCA TTC ACT CCT GCG GAG ACC TA | ACT CAT TGC ACG CTG CAT AAT CGC    |
| <i>SMTN</i>    | AGC ACC ATG ATG CAA ACC AAG ACC    | TCT GCG CCT TCA TCA GCT CTT TCT    |
| <i>SNAI1</i>   | TTT CTG GTT CTG TGT CCT CTG CCT    | TTC CCA GTG AGT CTG TCA GCC TTT    |
| <i>SNAI2</i>   | TTT CTG GGC TGG CCA AAC ATA AGC    | ACA CAA GGT AAT GTG TGG GTC CGA    |
| <i>TAGLN</i>   | ATG GCC AAC AAG GGT CCT TCC TAT    | ATC AGG GCC ACA CTG CAC TAT GAT    |
| <i>TBP</i>     | TGA GTT GCT CAT ACC GTG CTG CTA    | CCCTCAAACCAACTTGTCACAGC            |
| <i>TBX18</i>   | TTA ACC TTG TCC GTC TGC CTG AGT    | GTA ATGGGC TTT GGC CTT TGC ACT     |
| <i>TBX5</i>    | ACA AAG TGA AGG TGA CGG GCC TTA    | ATC TGT GAT CGT CGG CAG GTA CAA    |
| <i>TCF21</i>   | AGG CAG ATC CTG GCT AAC GAC AAA    | TCC AGG TAC CAA ACT CCA AGG TCA    |
| <i>TNNT2</i>   | TTC ACC AAA GAT CTG CTC CTC GCT    | TTA TTA CTG GTG TGG AGT GGG TGT GG |
| <i>UPK1B</i>   | AGT GAC TCT GGA TTT GGT GCT GGA    | AAG TCC GTA CCA TCT GAC TTG GCA    |
| <i>WT1</i>     | ATA GGC CAG GGC ATG TGTATG TGT     | AGT TGC CTG GCA GAA CTA CAT CCT    |
